# Supplementary material for: The effect of Translationally Controlled Tumour Protein (TCTP) on programmed cell death in plants
Source: PubMed Central journal article supplement (PMC3847524; doi:10.1186/1471-2229-13-135), 2013-09-16

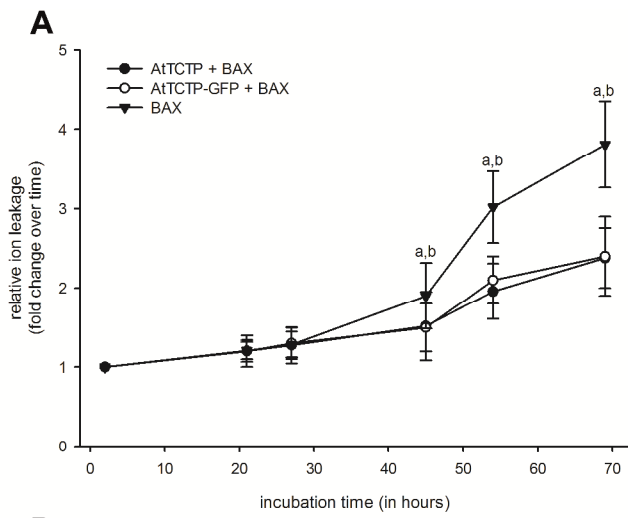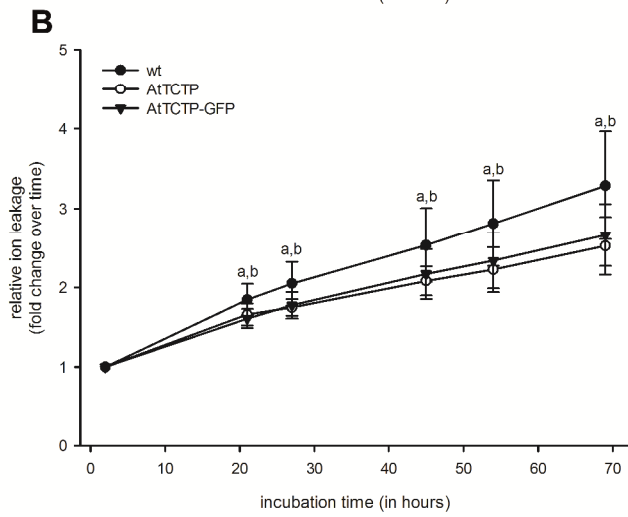

Supplement: 1471-2229-13-135-S1.pdf [file 1471-2229-13-135-S1.pdf]
